# Supplementary material for: Highly Efficient Biosynthesis of γ-Bisabolene with a New Sesquiterpene Synthase AcTPS5 by Dual Cytoplasmic-Peroxisomal Engineering in Saccharomyces cerevisiae
Source: MDPI journal article supplement (doi:10.3390/fermentation9090779), 2023-08-22
Supplement: s1 [file s1]

**Additional file**

**Highly efficient biosynthesis of (Z)- $\gamma$ -bisabolene with a new sesquiterpene synthase AcTPS5 by dual cytoplasmic-peroxisomal engineering in *Saccharomyces cerevisiae***

Jiajia Liu, Ge Yao, Xiukun Wan, Fuli Wang, Penggang Han, Shaoheng Bao, Kang Wang, Tianyu Song, Hui Jiang\*

State Key Laboratory of NBC Protection for Civilian, Beijing, 102205, People's Republic of China

\* Correspondence

## **Content**

**Table S1** Bisabolene synthases from different organisms.

**Table S2** Strains and plasmids.

**Table S3** Primers.

**Fig. S1** Plasmid map for expressing M1 module

**Fig. S2** Plasmid map for expressing M2 module

**Fig. S3** Plasmid map for expressing M3 module

**Fig. S4** Plasmid map for expressing M4 module

**Fig. S5** Plasmid map for expressing M5 module

**Fig. S6** Plasmid map for expressing M6 module

**Fig. S7** Plasmid map for expressing M7 module

**Fig. S8** Plasmid map for expressing M8 module

**Fig. S9** Plasmid map for expressing M9 module

**Fig. S10** Plasmid map for expressing M10 module

**Fig. S11** Plasmid map for expressing M11 module

**Fig. S12** Plasmid map for expressing M12 module

**Fig. S13** Plasmid map for expressing M13 module

**Fig. S14** Amino acids alignment of AcPS5 reported bisabolene synthases.

**Fig. S15** Phylogenetic analysis of AcTPS5 and bisabolene synthases from other species.

**Fig. S16** Time course profiles of cell growth.

**Table S1** Bisabolene synthases from different organisms.

| <b>ID No.</b> | <b>Protein</b> | <b>Accession No.</b> | <b>Organism</b>                    | <b>Reference</b> |
|---------------|----------------|----------------------|------------------------------------|------------------|
| 1             | Ag1            | AAC24192.1           | <i>Abies grandis</i>               | [46]             |
| 2             | PmeTPS3        | —                    | <i>Pseudotsuga menziesii</i>       | [47]             |
| 3             | ZoTps1         | BAI67934.1           | <i>Zingiber officinale</i>         | [48]             |
| 4             | GbTPS2         | AIU94290.1           | <i>Ginkgo biloba</i>               | [49]             |
| 5             | SaBS           | AIV42941.1           | <i>Santalum album</i>              | [50]             |
| 6             | AtTPS12        | NP_193064.2          | <i>Arabidopsis thaliana</i>        | [51]             |
| 7             | AtTPS13        | AEE83260.1           | <i>Arabidopsis thaliana</i>        | [51]             |
| 8             | HaTPS12-K7     | AME16497.1           | <i>Helianthus annuus</i>           | [52]             |
| 9             | HaTPS12-K11    | AME16498.1           | <i>Helianthus annuus</i>           | [52]             |
| 10            | NvIDS1         | A0A386JV86.1         | <i>Nezara viridula</i>             | [53]             |
| 11            | SaTPS2         | AZM65215.1           | <i>Santalum album</i>              | [54]             |
| 12            | SaTPS3         | AZM65216.1           | <i>Santalum album</i>              | [54]             |
| 13            | PvTPS03        | —                    | <i>Panicum virgatum L.</i>         | [55]             |
| 14            | PvTPS17        | —                    | <i>Panicum virgatum L.</i>         | [55]             |
| 15            | PvTPS83        | —                    | <i>Panicum virgatum L.</i>         | [55]             |
| 16            | PvTPS20        | —                    | <i>Panicum virgatum L.</i>         | [55]             |
| 17            | BbS            | WP_035857999         | <i>Cryptosporangium arvum</i>      | [21]             |
| 18            | PcSTS-08       | BCX55502.1           | <i>Phanerochaete chrysosporium</i> | [22]             |
| 19            | CcTPS2         | WGM49142.1           | <i>Colquhounia coccinea</i>        | [11]             |
| 20            | Tps1A          | —                    | <i>Antrodia cinnamomea</i>         | [3]              |
| 37            | Tps2A          | —                    | <i>Antrodia cinnamomea</i>         | [3]              |

**Table S2** Strains and plasmids.

| Strains or plasmids | Characteristics                                                                                                                                                                                                                                                                                                                                                                   | Derived from | Source     |
|---------------------|-----------------------------------------------------------------------------------------------------------------------------------------------------------------------------------------------------------------------------------------------------------------------------------------------------------------------------------------------------------------------------------|--------------|------------|
| <b>Strains</b>      |                                                                                                                                                                                                                                                                                                                                                                                   |              |            |
| JCR27               | ChrXII-2Δ:: <i>HygR</i> -P <sub>TEF1</sub> - <i>Cas9</i> ; ChrXI-3Δ:: P <sub>GAL1</sub> - <i>ERG8</i> , P <sub>GAL10</sub> - <i>tHMG1</i> , P <sub>GAL7</sub> - <i>ERG12</i> ; ChrX-3Δ:: P <sub>GAL1</sub> - <i>ERG13</i> , P <sub>GAL10</sub> - <i>tHMG1</i> ; ChrXII-4Δ:: P <sub>GAL1</sub> - <i>IDII</i> , P <sub>GAL10</sub> - <i>ERG10</i> , P <sub>GAL7</sub> - <i>MVD1</i> | [23]         | [23]       |
| LSc5                | pGAL1- <i>Actps5</i> , free replicating plasmid                                                                                                                                                                                                                                                                                                                                   | [20]         | [20]       |
| JCR29               | <i>GAL1Δ</i> :: P <sub>GAL1</sub> - <i>ERG10</i> , P <sub>GAL10</sub> - <i>ERG13</i> ; 911bΔ:: P <sub>GAL1</sub> - <i>tHMG1</i> , P <sub>GAL10</sub> - <i>ERG12</i> ; <i>LPP1Δ</i> :: P <sub>GAL1</sub> - <i>ERG8</i> , P <sub>GAL10</sub> - <i>MVD1</i> ; <i>LEU2Δ</i> :: P <sub>GAL1</sub> - <i>IDII</i> , P <sub>GAL10</sub> - <i>ERG20</i>                                    | JCR27        | This study |
| LSc90               | <i>URA3Δ</i> :: <i>Actps5</i> -ePTS1                                                                                                                                                                                                                                                                                                                                              | JCR29        | This study |
| LSc99               | <i>URA3Δ</i> :: <i>Actps5</i> -ePTS1; 308aΔ:: P <sub>GAL1</sub> - <i>tHMG1</i> -ePTS1, P <sub>GAL10</sub> - <i>Actps5</i> -ePTS1                                                                                                                                                                                                                                                  | JCR29        | This study |
| LSc100              | <i>URA3Δ</i> :: <i>Actps5</i> -ePTS1; 308aΔ:: P <sub>GAL1</sub> - <i>tHMG1</i> -ePTS1, P <sub>GAL10</sub> - <i>Actps5</i> -ePTS1; <i>ypl062wΔ</i> :: P <sub>GAL1</sub> - <i>tHMG1</i> -ePTS1, P <sub>GAL10</sub> - <i>Actps5</i> -ePTS1                                                                                                                                           | JCR29        | This study |
| LSc101              | <i>pex11Δ</i> :: P <sub>GAL1</sub> - <i>pex11</i>                                                                                                                                                                                                                                                                                                                                 | LSc99        | This study |
| LSc102              | <i>vps1Δ</i> :: P <sub>GAL1</sub> - <i>vps11</i>                                                                                                                                                                                                                                                                                                                                  | LSc99        | This study |
| LSc103              | <i>pex30Δ</i> , <i>pex31Δ</i> , <i>pex32Δ</i>                                                                                                                                                                                                                                                                                                                                     | LSc99        | This study |
| LSc104              | <i>Atg36Δ</i>                                                                                                                                                                                                                                                                                                                                                                     | LSc99        | This study |
| LSc105              | <i>pex11Δ</i> :: P <sub>GAL1</sub> - <i>pex11</i> ; <i>vps1Δ</i> :: P <sub>GAL1</sub> - <i>vps11</i>                                                                                                                                                                                                                                                                              | LSc99        | This study |
| LSc106              | <i>pex11Δ</i> :: P <sub>GAL1</sub> - <i>pex11</i> ; <i>pex30Δ</i> , <i>pex31Δ</i> , <i>pex32Δ</i>                                                                                                                                                                                                                                                                                 | LSc99        | This study |
| LSc107              | <i>pex11Δ</i> :: P <sub>GAL1</sub> - <i>pex11</i> ; <i>Atg36Δ</i>                                                                                                                                                                                                                                                                                                                 | LSc99        | This study |
| LSc108              | <i>vps1Δ</i> :: P <sub>GAL1</sub> - <i>vps11</i> ; <i>pex30Δ</i> , <i>pex31Δ</i> , <i>pex32Δ</i>                                                                                                                                                                                                                                                                                  | LSc99        | This study |
| LSc109              | <i>vps1Δ</i> :: P <sub>GAL1</sub> - <i>vps11</i> ; <i>Atg36Δ</i>                                                                                                                                                                                                                                                                                                                  | LSc99        | This study |
| LSc110              | <i>pex30Δ</i> , <i>pex31Δ</i> , <i>pex32Δ</i> ; <i>Atg36Δ</i>                                                                                                                                                                                                                                                                                                                     | LSc99        | This study |
| LSc111              | <i>pex11Δ</i> :: P <sub>GAL1</sub> - <i>pex11</i> ; <i>vps1Δ</i> :: P <sub>GAL1</sub> - <i>vps11</i> ; <i>Atg36Δ</i>                                                                                                                                                                                                                                                              | LSc99        | This study |
| LSc112              | <i>pex11Δ</i> :: P <sub>GAL1</sub> - <i>pex11</i> ; <i>pex30Δ</i> , <i>pex31Δ</i> , <i>pex32Δ</i> ; <i>Atg36Δ</i>                                                                                                                                                                                                                                                                 | LSc99        | This study |
| LSc113              | <i>vps1Δ</i> :: P <sub>GAL1</sub> - <i>vps11</i> ; <i>pex30Δ</i> , <i>pex31Δ</i> , <i>pex32Δ</i> ; <i>Atg36Δ</i>                                                                                                                                                                                                                                                                  | LSc99        | This study |
| LSc114              | <i>pex11Δ</i> :: P <sub>GAL1</sub> - <i>pex11</i> ; <i>vps1Δ</i> :: P <sub>GAL1</sub> - <i>vps11</i> ; <i>pex30Δ</i> , <i>pex31Δ</i> , <i>pex32Δ</i> ; <i>Atg36Δ</i>                                                                                                                                                                                                              | LSc99        | This study |
| LSc123              | <i>rox1Δ</i> :: P <sub>GAL10</sub> - <i>Actps5</i> , P <sub>GAL1</sub> - <i>tHMG1</i> , P <sub>GAL7</sub> - <i>ERG20</i>                                                                                                                                                                                                                                                          | LSc102,      | This study |
| LSc115              | <i>rox1Δ</i> :: P <sub>GAL10</sub> - <i>Actps5</i> , P <sub>GAL1</sub> - <i>tHMG1</i> , P <sub>GAL7</sub> - <i>ERG20</i>                                                                                                                                                                                                                                                          | LSc104,      | This study |
| LSc125              | <i>rox1Δ</i> :: P <sub>GAL10</sub> - <i>Actps5</i> , P <sub>GAL1</sub> - <i>tHMG1</i> , P <sub>GAL7</sub> - <i>ERG20</i>                                                                                                                                                                                                                                                          | LSc105,      | This study |
| LSc128              | <i>rox1Δ</i> :: P <sub>GAL10</sub> - <i>Actps5</i> , P <sub>GAL1</sub> - <i>tHMG1</i> , P <sub>GAL7</sub> - <i>ERG20</i>                                                                                                                                                                                                                                                          | LSc107       | This study |

|                              |                                                                                                                                                                                                             |          |            |
|------------------------------|-------------------------------------------------------------------------------------------------------------------------------------------------------------------------------------------------------------|----------|------------|
| LSc130                       | <i>rox1Δ:: P<sub>GAL10</sub>-Actps5, P<sub>GAL1</sub>-tHMG1, P<sub>GAL7</sub>-ERG20</i>                                                                                                                     | LSc109   | This study |
| LSc124                       | <i>rox1Δ:: P<sub>GAL10</sub>-Actps5, P<sub>GAL1</sub>-tHMG1, P<sub>GAL7</sub>-ERG20; exg1Δ:: P<sub>GAL10</sub>-Actps5, P<sub>GAL1</sub>-tHMG1; dpp1Δ:: P<sub>GAL10</sub>-Actps5, P<sub>GAL1</sub>-tHMG1</i> | LSc102   | This study |
| LSc116                       | <i>rox1Δ:: P<sub>GAL10</sub>-Actps5, P<sub>GAL1</sub>-tHMG1, P<sub>GAL7</sub>-ERG20; exg1Δ:: P<sub>GAL10</sub>-Actps5, P<sub>GAL1</sub>-tHMG1; dpp1Δ:: P<sub>GAL10</sub>-Actps5, P<sub>GAL1</sub>-tHMG1</i> | LSc104   | This study |
| LSc127                       | <i>rox1Δ:: P<sub>GAL10</sub>-Actps5, P<sub>GAL1</sub>-tHMG1, P<sub>GAL7</sub>-ERG20; exg1Δ:: P<sub>GAL10</sub>-Actps5, P<sub>GAL1</sub>-tHMG1; dpp1Δ:: P<sub>GAL10</sub>-Actps5, P<sub>GAL1</sub>-tHMG1</i> | LSc105   | This study |
| LSc129                       | <i>rox1Δ:: P<sub>GAL10</sub>-Actps5, P<sub>GAL1</sub>-tHMG1, P<sub>GAL7</sub>-ERG20; exg1Δ:: P<sub>GAL10</sub>-Actps5, P<sub>GAL1</sub>-tHMG1; dpp1Δ:: P<sub>GAL10</sub>-Actps5, P<sub>GAL1</sub>-tHMG1</i> | LSc107   | This study |
| LSc131                       | <i>rox1Δ:: P<sub>GAL10</sub>-Actps5, P<sub>GAL1</sub>-tHMG1, P<sub>GAL7</sub>-ERG20; exg1Δ:: P<sub>GAL10</sub>-Actps5, P<sub>GAL1</sub>-tHMG1; dpp1Δ:: P<sub>GAL10</sub>-Actps5, P<sub>GAL1</sub>-tHMG1</i> | LSc109   | This study |
| LSc133                       | <i>TRP1Δ:: P<sub>GAL10</sub>-Actps5; P<sub>GAL1</sub>-tHMG1</i>                                                                                                                                             | LSc124   | This study |
| LSc126                       | <i>TRP1Δ:: P<sub>GAL10</sub>-Actps5; P<sub>GAL1</sub>-tHMG1</i>                                                                                                                                             | LSc116   | This study |
| LSc135                       | <i>TRP1Δ:: P<sub>GAL10</sub>-Actps5; P<sub>GAL1</sub>-tHMG1</i>                                                                                                                                             | LSc127   | This study |
| LSc136                       | <i>TRP1Δ:: P<sub>GAL10</sub>-Actps5; P<sub>GAL1</sub>-tHMG1</i>                                                                                                                                             | LSc129   | This study |
| LSc137                       | <i>TRP1Δ:: P<sub>GAL10</sub>-Actps5; P<sub>GAL1</sub>-tHMG1</i>                                                                                                                                             | LSc131   | This study |
| LSc149                       | <i>ACO1Δ</i>                                                                                                                                                                                                | LSc137   | This study |
| LSc150                       | <i>ADH1Δ</i>                                                                                                                                                                                                | LSc137   | This study |
| LSc152                       | <i>MLS1Δ</i>                                                                                                                                                                                                | LSc137   | This study |
| LSc153                       | <i>1309aΔ:: P<sub>GAL10</sub>-ALD2, P<sub>GAL1</sub>-ALD6</i>                                                                                                                                               | LSc137   | This study |
| LSc154                       | <i>1414aΔ:: P<sub>GAL10</sub>-ACSI, P<sub>GAL1</sub>-ACS2</i>                                                                                                                                               | LSc137   | This study |
| LSc155                       | <i>1041aΔ:: P<sub>GAL10</sub>-YIACLI, P<sub>GAL1</sub>- YIACL2, P<sub>GAL7</sub>- CTP1</i>                                                                                                                  | LSc137   | This study |
| LSc156                       | <i>CIT2Δ</i>                                                                                                                                                                                                | LSc137   | This study |
| LSc172                       | <i>ACO1Δ, MLS1Δ</i>                                                                                                                                                                                         | LSc137   | This study |
| LSc164                       | <i>ACO1Δ, ADH1Δ, MLS1Δ</i>                                                                                                                                                                                  | LSc137   | This study |
| LSc165                       | <i>1414aΔ:: P<sub>GAL10</sub>-ACSI, P<sub>GAL1</sub>-ACS2</i>                                                                                                                                               | LSc153   | This study |
| LSc166                       | <i>1041aΔ:: P<sub>GAL10</sub>-YIACLI, P<sub>GAL1</sub>- YIACL2, P<sub>GAL7</sub>- CTP1</i>                                                                                                                  | LSc165   | This study |
| LSc173                       | <i>ACO1Δ, MLS1Δ</i>                                                                                                                                                                                         | LSc165   | This study |
| LSc174                       | <i>P<sub>HXT1</sub>-ERG9</i>                                                                                                                                                                                | LSc166   | This study |
| LSc175                       | <i>GAL80Δ:: P<sub>TRP1</sub>-TRP1, P<sub>HIS3</sub>-HIS3, P<sub>URA3</sub>-URA3, P<sub>LEU2</sub>-LEU2</i>                                                                                                  | LSc174   | This study |
| <i>Escherichia coli</i> DH5α | Used for routine cloning                                                                                                                                                                                    | Purchase | Gibco BRL  |
| <b>Plasmids</b>              |                                                                                                                                                                                                             |          |            |
| pRS462                       | Routine cloning and expressing vector, 2 μ origin, Amp <sup>R</sup> , <i>URA</i>                                                                                                                            |          | this lab   |
| pEASY-Blunt                  | Routing cloning vector                                                                                                                                                                                      |          | TransGen   |
| pCas                         | Expressing Cas9 and gRNA vector for genome editing                                                                                                                                                          |          | [56]       |

|         |                                                                                                                                             |            |
|---------|---------------------------------------------------------------------------------------------------------------------------------------------|------------|
| SgRNA   | contain the sequences of tRNA and gRNA scaffold                                                                                             | [56]       |
| KIURA3  | contain the truncated URA3                                                                                                                  | [56]       |
| pLJJ39  | pRS426, P <sub>GAL10</sub> - <i>Actps5</i> , P <sub>GAL1</sub> - <i>tHMG1</i> , P <sub>GAL7</sub> - <i>ERG20</i> , pRS462 <i>URA</i> , AmpR | This study |
| pLJJ28  | pCas, gRNA_ <i>rox1</i> , AmpR                                                                                                              | [20]       |
| pLJJ42  | pRS426, P <sub>GAL10</sub> - <i>Actps5</i> , P <sub>GAL1</sub> - <i>tHMG1</i> , <i>URA</i> , AmpR                                           | This study |
| pLJJ148 | pRS426, P <sub>GAL10</sub> - <i>Actps5</i> , P <sub>GAL1</sub> - <i>tHMG1</i> , <i>URA</i> , AmpR                                           | This study |
| pLJJ30  | pCas, gRNA_ <i>exg1</i> , gRNA_ <i>dpp1</i> , AmpR                                                                                          | [20]       |
| pLJJ150 | pRS426, P <sub>GAL10</sub> - <i>Actps5</i> , P <sub>GAL1</sub> - <i>tHMG1</i> , <i>URA</i> , AmpR                                           | This study |
| pLJJ151 | pCas, gRNA_ <i>trp1</i> , AmpR                                                                                                              | This study |
| pLJJ105 | pRS426, P <sub>GAL10</sub> - <i>ERG10</i> -ePTS1, P <sub>GAL1</sub> - <i>ERG13</i> -ePTS1, <i>URA</i> , AmpR                                | This study |
| pLJJ106 | pRS426, P <sub>GAL10</sub> - <i>ERG8</i> -ePTS1, P <sub>GAL1</sub> - <i>ERG12</i> -ePTS1, <i>URA</i> , AmpR                                 | This study |
| pLJJ107 | pRS426, P <sub>GAL10</sub> - <i>tHMG1</i> -ePTS1, P <sub>GAL1</sub> - <i>ID11</i> -ePTS1, <i>URA</i> , AmpR                                 | This study |
| pLJJ115 | pRS426, P <sub>GAL10</sub> - <i>MVD1</i> -ePTS1, P <sub>GAL1</sub> - <i>ERG20</i> -ePTS1, <i>URA</i> , AmpR                                 | This study |
| pLJJ108 | pCas, gRNA_911b, gRNA_ <i>GAL1</i> , gRNA_ <i>Lpp1</i> , gRNA_ <i>LEU2</i> , AmpR                                                           | This study |
| pLJJ147 | pRS426, P <sub>GAL10</sub> - <i>Actps5</i> -ePTS1, <i>URA</i> , AmpR                                                                        | This study |
| pLJJ149 | pCas, gRNA_ <i>URA3</i> , AmpR                                                                                                              | This study |
| pLJJ161 | pRS426, P <sub>GAL10</sub> - <i>Actps5</i> -ePTS1, P <sub>GAL10</sub> - <i>tHMG1</i> -ePTS1, <i>URA</i> , AmpR                              | This study |
| pLJJ163 | pCas, gRNA_308a, AmpR                                                                                                                       | This study |
| pLJJ162 | pRS426, P <sub>GAL10</sub> - <i>Actps5</i> -ePTS1, P <sub>GAL10</sub> - <i>tHMG1</i> -ePTS1, <i>URA</i> , AmpR                              | This study |
| pLJJ164 | pCas, gRNA_ <i>yp1062w</i> , AmpR                                                                                                           | This study |
| pLJJ123 | pRS426, P <sub>GAL2</sub> - <i>pex11</i> , <i>TRP1</i> , TRP, AmpR                                                                          | This study |
| pLJJ125 | Blunt, P <sub>GAL10</sub> - <i>vps1</i> , <i>URA</i> , AmpR                                                                                 | This study |
| pLJJ126 | pCas, gRNA_ 511b, AmpR                                                                                                                      | This study |
| pLJJ117 | Blunt, LB- <i>pex30</i> - RB, <i>URA</i> , AmpR                                                                                             | This study |
| pLJJ118 | Blunt, LB- <i>pex31</i> - RB, <i>URA</i> , AmpR                                                                                             | This study |
| pLJJ119 | Blunt, LB- <i>pex32</i> - RB, <i>URA</i> , AmpR                                                                                             | This study |
| pLJJ120 | pCas, gRNA_ <i>pex30</i> , gRNA_ <i>pex31</i> , gRNA_ <i>pex32</i> , AmpR                                                                   | This study |
| pLJJ190 | Blunt, LB- <i>ACO1</i> - RB, <i>URA</i> , AmpR                                                                                              | This study |
| pLJJ191 | pCas, gRNA_ <i>ACO1</i> , AmpR                                                                                                              | This study |
| pLJJ189 | Blunt, LB- <i>ACO1</i> - RB, TRP, AmpR                                                                                                      | This study |
| pLJJ192 | Blunt, LB- <i>MLS1</i> - RB, <i>URA</i> , AmpR                                                                                              | This study |
| pLJJ193 | pCas, gRNA_ <i>MLS1</i> , AmpR                                                                                                              | This study |
| pLJJ194 | Blunt, LB- <i>CIT2</i> -RB, <i>URA</i> , AmpR                                                                                               | This study |
| pLJJ195 | pCas, gRNA_ <i>CIT2</i> , AmpR                                                                                                              | This study |
| pLJJ34  | pRS426, pHXT1- <i>ERG9</i>                                                                                                                  | [20]       |
| pLJJ132 | pRS426, <i>URA3</i> , <i>TRP1</i> , <i>HIS3</i> , <i>LEU2</i> , AmpR, <i>URA3</i>                                                           | This study |

|         |                        |            |
|---------|------------------------|------------|
| pLJJ134 | pCas, gRNA_GAL80, AmpR | This study |
|---------|------------------------|------------|

**Table S3** Primers.

| Primer name | Primer sequence 5'-3'                                          |
|-------------|----------------------------------------------------------------|
| pPent1-5-F  | AGCTGGAGCTCTAGTAGTTTAAACAGTCATGTAGCCGCCTAGCGAG<br>CCTGGGT      |
| pPent1-5-R  | TGGGACGCTCGAAGGCTTTAATTTGCGATGTGCTGTCTGAACAGAA<br>TAAATGCGTTCT |
| pLJJ39-1-F  | GCAAATTAAAGCCTTCGAGCGTCCCA                                     |
| pLJJ39-1-R  | ACAGGCCCTTTTCCTTTGTCG                                          |
| pLJJ39-2-F  | CGACAAAGGAAAAGGGGCCTGTTTACTCGAGAGCTCTACAAG                     |
| pLJJ39-2-R  | AATTTTGAATAATTCAATATAAATGGCTGCTGATCCAAGTGTACTT                 |
| pLJJ39-3-F  | TTATATTGAATTTTCAAAAATTCTTA                                     |
| pLJJ39-3-R  | TATAGTTTTTCTCCTTGACGT                                          |
| pLJJ39-4-F  | AACGTCAAGGAGAAAAAACTATAATGGCTTCAGAAAAAGAAATTA                  |
| pLJJ39-4-R  | TTTCAAGAAGGATAGTAAGCTGGCAAATTTGCTTCTCTTGTAAG<br>CTTTGTTCAAG    |
| pLJJ39-5-F  | TTTGCCAGCTTACTATCCTTCTTGA                                      |
| pLJJ39-5-R  | TTTTGAGGGAATATTCAACTGTTT                                       |
| pLJJ39-6-F  | AAAACAGTTGAATATTCCCTCAAAAATGGTTTTAACCAATAAAACA                 |
| pLJJ39-6-R  | AATCATAAATCATAAGAAATTCGCTTAGGATTTAATGCAGGTGACGG                |
| pLJJ39-7-F  | GCGAATTTCTTATGATTTATGATT                                       |
| pLJJ39-7-R  | CCGGTAGAGGTGTGGTCAATAAGAGC                                     |
| pLJJ39-8-F  | CTCTTATTGACCACCTCTACCGGATCTTAATAGACGAATGGACCG<br>CTCAA         |
| pLJJ39-8-R  | ATGATATCGACAAAGGAAAAGGGGCCTGTTCAACCTCTGACCAAGA<br>CGGTTTCTTC   |
| pPent1-4-F  | TAGCCTAGTTTCTCGTTTAAACAACAGTTGCGCAGCCTGAATGGCG<br>AATGGCGCGACG |
| pPent1-8-R  | CGTCGCGCCATTCGCCATTCAGGCTGCGCAACTGTTGTTTAAACGA<br>GAAACTAGGCTA |
| pPent2-2-F  | CAAAAGCTGGAGCTCTAGTAGTTTAACTAATAGTACGTAATGTAGG<br>AAGCCTGCTTC  |
| pPent2-2-R  | TTTGGGACGCTCGAAGGCTTTAATTTGCTTGACACCACGGATTGGTT<br>CTCCGAGGGAA |
| pLJJ42-1-F  | TCGACAAAGGAAAAGGGGCCTGTTTAGGATTTAATGCAGGTGACG<br>GACCC         |
| pLJJ42-1-R  | GTAAGAATTTTGAATAATTCAATATAAATGGTTTTAACCAATAAAAC<br>AGTC        |

|             |                                                                 |
|-------------|-----------------------------------------------------------------|
| pLJJ42-2-F  | ACGTCAAGGAGAAAAAACTATAATGGCTGCTGATCCAACTGTTACT                  |
| pLJJ42-2-R  | TATCGATTTCAATTCAATTCAATTTACTCGAGAGCTCTACAAGTTTGC                |
| pLJJ42-3-F  | ATTGAATTGAATTGAAATCGATAGA                                       |
| pLJJ42-3-R  | AACGAACGCAGAATTTTCGAGTTATTAA                                    |
| pPent2-4-F  | GTTTAATAACTCGAAAATTCTGCGTTCGTTTGGTTGGTTACTTCTTG<br>AACCATACATT  |
| pPent2-4-R  | CCATTCGCCATTCAAGGCTGCGCAACTGTTGTTTAAACTTGTAACACC<br>AGATAATCCAA |
| pLJJ148-1-F | CTGGAGCTCTAGTAGTTTAAACTTTTATTGTTTCCTGTTGTTTTTCT                 |
| pLJJ148-1-R | GGACGCTCGAAGGCTTTAATTTGCGAGGATCCCGGATGAGGAATTA<br>CA            |
| pLJJ148-2-F | AACTCGAAAATTCTGCGTTCGTTGTGACTGCTTCCTCCAGGGTGAC<br>ATC           |
| pLJJ148-2-R | GCAACTGTTGTTTAAACTTTGTCGATCGGTTGTATATTTT                        |
| pLJJ150-1-F | AACAAAAGCTGGAGCTCTAGTAGTTTAAACCTCTATTCTGAAAACG<br>GAAG          |
| pLJJ150-1-R | GACGCTCGAAGGCTTTAATTTGCCCAAACATCCTCCTTAGGTTGAT<br>TAC           |
| pLJJ150-2-F | AATAACTCGAAAATTCTGCGTTCGTTGAAAATGTTGGTGATGCGCTT<br>AGA          |
| pLJJ150-2-R | TGCGCAACTGTTGTTTAAACGTTTAAACCTTTCAAGAATTCCACATG<br>TTA          |
| pLJJ151-1-F | GGTCTCGGATCGGACAGGTGAACTTTTGGATGTTTTAGAGCTAGAA<br>ATAGCAAGTTA   |
| pLJJ151-1-R | GGTCTCTTGCGCAAGCCCGGAATCGAACC                                   |
| pLJJ151-2-F | GGTCTCACGCATTTTTTTGGATCCATCTAAAGTCATTTCA                        |
| pLJJ151-2-R | GGTCTCAAAACCTTTTTTCGATGATGTAGTTTCTGG                            |
| pLJJ105-1-F | CTGGAGCTCTAGTAGTTTAAACGACTAAATCTCATTCAGAAGAAG                   |
| pLJJ105-1-R | TCGCTCTTATTGACCACACCTCTACCGGTTTTCCAGAAGGTAAACA<br>A             |
| pLJJ105-2-R | TTGGGTAGAGGTAGAAGATCTAAATTGTGAGCGAATTTCTTATGATT<br>TATGATTTT    |
| pLJJ105-3-F | TCACAATTTAGATCTTCTACCTCTACCCAATATCTTTTCAATGACAAT<br>AGAGGAAG    |
| pLJJ105-3-R | AAAGTAAGAATTTTTGAAAATTCAATATAAATGTCTCAGAACGTTTA<br>CATTGTATCG   |
| pLJJ105-4-F | ACTTTAACGTCAAGGAGAAAAAACTATAATGAACTCTCAACTAAA<br>CTTTGTTGGT     |
| pLJJ105-4-R | CAATTTAGATCTTCTACCTCTACCCAATTTTTTAACATCGTAAGATCT<br>TCTAAAT     |
| pLJJ105-5-F | TTGGGTAGAGGTAGAAGATCTAAATTGTAAACAGGCCCTTTTCCTT<br>TGTCGATAT     |
| pLJJ105-6-F | GACGACTCGAAGGCTTTAATTTGCAGTATACTTCTTTTTTTTACTTTG<br>TTC         |



|             |                                                                |
|-------------|----------------------------------------------------------------|
| pLJJ105-6-R | CAGGCTGCGCAACTGTTGTTTAAACTCCAAATCCACATTATTTGGCG<br>CA          |
| pLJJ106-1-F | CAAAAGCTGGAGCTCTAGTAGTTTAAACATCTGTTGCAAAAATAGG<br>CCTG         |
| pLJJ106-1-R | GCTCTTATTGACCACACCTCTACCGGTTATATATACATTTATATTTATG<br>C         |
| pLJJ106-2-F | TCACAATTTAGATCTTCTACCTCTACCCAATTTATCAAGATAAGTTTC<br>CGGATC     |
| pLJJ106-2-R | TAAGAATTTTTGAAAATTCAATATAAATGTCAGAGTTGAGAGCCTTC<br>AGTG        |
| pLJJ106-3-F | CTTTAACGTCAAGGAGAAAAAACTATAATGTCATTACCGTTCTTAAC<br>TTCTGCACC   |
| pLJJ106-3-R | CAATTTAGATCTTCTACCTCTACCCAATGAAGTCCATGGTAAATTCGT<br>GTTT       |
| pLJJ106-4-F | GGACGCTCGAAGGCTTTAATTTGCAGAAGTAAATGAAAAATGAAAT<br>AGCA         |
| pLJJ106-4-R | CATTCAGGCTGCGCAACTGTTGTTTAAACCCAACAATATGGGTACG<br>AGAGA        |
| pLJJ107-1-F | GAACAAAAGCTGGAGCTCTAGTAGTTTAAACCTAAGTCTTCTAAGC<br>TCTTTTCATAGT |
| pLJJ107-1-R | AGGTCGCTCTTATTGACCACACCTCTACCGGTAACACTTACAGAGTC<br>CTATCAGGA   |
| pLJJ107-2-F | TGGGTCCGTACCTGCATTAAATCCTTGGGTAGAGGTAGAAGATCTA<br>AATTGTG      |
| pLJJ107-2-R | AAGAATTTTTGAAAATTCAATATAAATGGTTTTAACCAATAAAACAG                |
| pLJJ107-3-F | TTAACGTCAAGGAGAAAAAACTATAATGACTGCCGACAACAATAGT<br>ATG          |
| pLJJ107-3-R | CAATTTAGATCTTCTACCTCTACCCAATAGCATTCTATGAATTTGCCT<br>GTCA       |
| pLJJ107-4-F | GGACGCTCGAAGGCTTTAATTTGCCCTTGGTAGAATATGACGAGTTT<br>C           |
| pLJJ107-4-R | CCATTCAGGCTGCGCAACTGTTGTTTAAACGGAATAACAGAGTTAA<br>TTTTG        |
| pLJJ115-1-F | AAAAGCTGGAGCTCTAGTAGTTTAAACATTTCTCAACAAGTAATTG<br>GTT          |
| pLJJ115-1-R | GGTCGCTCTTATTGACCACACCTCTACCGGTTCCCTTTCTCTTACCAA<br>AGTAAATAC  |
| pLJJ115-2-F | TTACAATTTAGATCTTCTACCTCTACCCAATTCCTTTGGTAGACCAGT<br>CTTTGCG    |
| pLJJ115-2-R | GAATTTTTGAAAATTCAATATAAATGACCGTTTACACAGCATCCGTT<br>ACCG        |
| pLJJ115-3-F | TTTAACGTCAAGGAGAAAAAACTATAATGGCTTCAGAAAAAGAAAT<br>TAGG         |
| pLJJ115-3-R | CAATTTAGATCTTCTACCTCTACCCAATTTGCTTCTCTTGTAACCTTT               |

|             |                                                                   |
|-------------|-------------------------------------------------------------------|
|             | GTTCAAGAA                                                         |
| pLJJ115-4-F | GGGACGCTCGAAGGCTTTAATTTGCAACGAATTCCTACATTGAAG<br>GTTC             |
| pLJJ115-4-R | GCTGCGCAACTGTTGTTTAACTAGTACTGAAGAGGAGGTCGACTA                     |
| pLJJ108-1-F | GGTCTCGGATCGTAATATTGTCTTGTTTCCCGTTTTAGAGCTAGAAAT<br>AGCA          |
| pLJJ108-1-R | GGTCTCTTGCGCAAGCCCGGAATCGAACC                                     |
| pLJJ108-2-F | GGTCTCACGCACCTTGCCAATGAGTTCTACAGTTTTAGAGCTAGAA<br>ATAGCAAGTTAA    |
| pLJJ108-2-R | GGTCTCTATCCAAAAAATGCGCAAGCCCGGAATCGAAC                            |
| pLJJ108-3-F | GGTCTCAGGATCCATCTAAAGTCATTTT                                      |
| pLJJ108-3-R | GGTCTCTTTGCGATCATTTATCTTTCACTGCGGAG                               |
| pLJJ108-4-F | GGTCTCAGCAACTTCTTGATTGCGTGGTTTTAGAGCTAGAAATAGC<br>AAGTTAAAATA     |
| pLJJ108-4-R | GGTCTCTAATCTGCGCAAGCCCGGAATCGAACC                                 |
| pLJJ108-5-F | GGTCTCGGATTCTTTGCACTTCTGGAAGTTTTAGAGCTAGAAATAGC                   |
| pLJJ108-5-R | GGTCTCAAAACAAAAAATGCGCAAGCCCGGAATCGAACC                           |
| pLJJ147-1-F | GCTGGAGCTCTAGTAGTTTAAACACGCAGATAATTCCAGGTATT                      |
| pLJJ147-1-R | TAAAACTGAAAGTTCCAAAGAGAACTTCGTTTCCTGCAGGTTTTT                     |
| pLJJ147-2-F | CGTCAAGGAGAAAAAACTATAATGGCTGCTGATCCAAGTGTACT                      |
| pLJJ147-2-R | TTACAATTTAGATCTTCTACCTCTACCCAAGTTCGAGAGCTCTACAAG<br>TTTGCATCAAT   |
| pLJJ147-3-F | TTGGGTAGAGGTAGAAGATCTAAATTGTAAATTGAATTGAATTGAAA<br>TCGATAGATC     |
| pLJJ147-3-R | AACGAACGCAGAATTTTCGAGTTATTAAA                                     |
| pLJJ147-4-F | TAACTCGAAAATTCTGCGTTTCGTTGATAATGCATGTATACTAACTC<br>AC             |
| pLJJ147-4-R | AGGCTGCGCAACTGTTGTTTAAACCGTTTAAGGGCAAATGTACTCT<br>CGC             |
| pLJJ161-1-F | GCTGGAGCTCTAGTAGTTTAAACGTTATATTCAGAAAAATTATTCA<br>A               |
| pLJJ161-1-R | ACGCTCGAAGGCTTTAATTTGCTTAGATAAAAAGAAAAAATTTCGA<br>A               |
| pLJJ161-2-F | GCAAATTAAAGCCTTCGAGCGT                                            |
| pLJJ161-2-R | TTGGGTAGAGGTAGAAGATCTAAATTGTAAACAGGCCCTTTTCCTT<br>TGTCGAT         |
| pLJJ161-3-F | ACAATTTAGATCTTCTACCTCTACCCAAGGATTTAATGCAGGTGACG<br>GACCCATCTTT    |
| pLJJ161-3-R | GTATTACTGAAAGTTCCAAAGAGAAATGGTTTTAACCAATAAAACA<br>GTCA            |
| pLJJ161-4-F | ACGTCAAGGAGAAAAAACTATAATGGCTGCTGATCCAAGTGTACT                     |
| pLJJ161-4-R | ACAATTTAGATCTTCTACCTCTACCCAAGTTCGAGAGCTCTACAAGTT<br>TGCATCAATGGAA |
| pLJJ161-5-F | TTGGGTAGAGGTAGAAGATCTAAATTGTAAATTGAATTGAATTGAAA                   |

|             |                                                              |
|-------------|--------------------------------------------------------------|
|             | TCGATAGA                                                     |
| pLJJ161-5-R | AACGAACGCAGAATTTTCGAGTTATTAAAC                               |
| pLJJ161-6-F | GTTTAATAACTCGAAAATTCTGCGTTCGTTATTACTTGTCTTCTTTGC<br>TACATATT |
| pLJJ161-6-R | CCATTCAGGCTGCGCAACTGTTGTTTAACTAGAACGAGTACAACA<br>CCCGATCCTCT |
| pLJJ162-1-F | AAGCTGGAGCTCTAGTAGTTTAAACACCTAACAGTTACAAATTGC                |
| pLJJ162-1-R | GACGCTCGAAGGCTTTAATTTGCGCCCTTACGTGAGGGGCAGTGTC               |
| pLJJ162-2-F | ATAACTCGAAAATTCTGCGTTCGTTACCGACCATGTGGGCAAATTC<br>GT         |
| pLJJ162-2-R | CAGGCTGCGCAACTGTTGTTTAACTTCTTCAAGTTAGATTCAGAA<br>GAG         |
| pLJJ149-1-F | GGTCTCGGATCGCAGACATTACGAATGCACAGTTTTAGAGCTAGAA<br>ATAGCAAGTT |
| pLJJ149-1-R | GGTCTCTTGCGCAAGCCCGGAATCGAACC                                |
| pLJJ163-1-F | GGTCTCGGATCCACTTGTCAAACAGAATATAGTTTTAGAGCTAGAA<br>ATAGCA     |
| pLJJ164-1-F | GGTCTCGGATCAAGCAACCAGCACGTCGCCGGTTTTAGAGCTAGAA<br>ATAGCA     |
| pLJJ123-1-F | GCTGGAGCTCTAGTAGTTTAAACAGTTTGCCATCGTGCAAATATAAG              |
| pLJJ123-1-R | TTTTGCTGCTTTTACCGTCGCGTTTCCTCACATATTTGTCTTCACCCT             |
| pLJJ123-2-F | AAACGCGACGGTAAAAGCAGCAAAA                                    |
| pLJJ123-2-R | TATGAAAGAATTATTTTTTTTATTA                                    |
| pLJJ123-3-F | TAATAAAAAAATAATTCCTTTCTCATAATGGTCTGTGATACTGGT<br>ATATC       |
| pLJJ123-3-R | ATCTATCGATTTCAATTCAATTCAATCTATGTAGCTTTCCACATGTCTT            |
| pLJJ123-4-F | TAACTCGAAAATTCTGCGTTCGTTCTCTATTCTGAAAACGGAAGAG<br>GAGTAG     |
| pLJJ123-4-R | TGGTGTTTATGCAAAGAAACCACT                                     |
| pLJJ123-5-F | AGTGGTTTCTTTGCATAAACACCAATATAATCACTAAATAAAGTAGA<br>TTTT      |
| pLJJ123-5-R | CAGGCTGCGCAACTGTTGTTTAAACCTGTGAAAGGATCGGACCCAT<br>AA         |
| pLJJ125-1-F | CTGGAATTGCCCTTGTTTAAACTTTGCACATAAAGGGTGCCTTCAAC              |
| pLJJ125-1-R | GAAATCTGTACCAACCGTATAGGTGAAAGA                               |
| pLJJ125-2-F | TTCACCTATACGGTTGGTACAGATTTCTTATATTGAATTTTCAAAAAT<br>TCTT     |
| pLJJ125-2-R | TAATAGTAGAAATTAAATGCTCATCCATTATAGTTTTTTCTCCTTGAC<br>GTTA     |
| pLJJ125-3-F | ATAATGGATGAGCATTTAATTTCTACTATTAACA                           |
| pLJJ125-3-R | CTAAACAGAGGAGACGATTTGACTAGCGC                                |
| pLJJ125-4-F | ATAACTCGAAAATTCTGCGTTCGTTTATTACGTCGTTTGCTTCAATTT<br>TCTTCG   |
| pLJJ125-4-R | AGCTACCAAGGCTGTTTCTGAGCAAAGTTTAAAC                           |

|             |                                                                |
|-------------|----------------------------------------------------------------|
| pLJJ126-1-F | GGTCTCGGATCCAGTGTATGCCAGTCAGCCAGTTTTAGAGCTAGAA<br>ATAGCA       |
| pLJJ117-1-F | GTTTAAACCGTTGACCGTTAAAGTGTATTTATCTAAATCC                       |
| pLJJ117-1-R | TGAAAATCAGTTTTTACACTCCGGAGG                                    |
| pLJJ117-2-F | GATCCTCCGGAGTGTA AAAACTGATTTTCATGCTCGCTCCCGTTTTT<br>ACCTTTAC   |
| pLJJ117-2-R | GTTTAAACAACAAGGCCGTAAGCCATTCAGACAA                             |
| pLJJ118-1-F | GTTTAAACTCCGGCTGCCAGAGCGAACAATATTAA                            |
| pLJJ118-1-R | ACTATCAAATAAAGGGAAACCAAGGCTTG                                  |
| pLJJ118-2-F | CAAGCCTTGGTTTCCCTTTATTTGATAGTTGAGTGCATGCCCCATATG<br>GACAACA    |
| pLJJ118-2-R | GTTTAAACCATTCAAATACACTTTAAGGCCAGAGT                            |
| pLJJ119-1-F | GTTTAAACTGTGTGTATTCTTTTTGAGTGCCATCC                            |
| pLJJ119-1-R | GCAGTTTAGAGGCTTAAAGCAATACTATTCTTTCCTTGAAATTAGCA<br>AAATGATGTCC |
| pLJJ119-2-F | GAATAGTATTGCTTTAAGCCTCTAAACTGC                                 |
| pLJJ119-2-R | GTTTAAACGCAAAATACATTGCTAAATATGAGGAG                            |
| pLJJ120-1-F | GGTCTCGGATCTTGCAGAGACGCTGCAACCGGTTTTAGAGCTAGAA<br>ATAGCA       |
| pLJJ120-1-R | GGTCTCTTGCGCAAGCCCGGAATCGAACC                                  |
| pLJJ120-2-F | GGTCTCACGCACAGCGCCGCTGGCTTGGCATGTTTTAGAGCTAGAA<br>ATAGCA       |
| pLJJ120-2-R | GGTCTCTATCCAAAAAATGCGCAAGCCCGGAATCGAACCG                       |
| pLJJ120-3-F | GGTCTCAGGATCCATCTAAAGTCATTTCAAC                                |
| pLJJ120-3-R | GGTCTCTCCATGATCATTATCTTTCACTGCGGAGAAG                          |
| pLJJ120-4-F | GGTCTCAATGGTTAGGCATTATAAGCGGTTTTAGAGCTAGAAATAGC<br>A           |
| pLJJ120-4-R | GGTCTCAAAACAAAAAATGCGCAAGCCCGGAATCGAACCGG                      |
| pLJJ190-1-F | ATCGATTTTGGGTTTATTTTGTATTTGTC                                  |
| pLJJ190-1-R | TAATGGTAGTATTTATTACCTTCGTTCTACTA                               |
| pLJJ190-2-F | TAGTAGAACGAAGGTAATAAATACTACCATTAATGGTTCAAATATGG<br>TTCTGCCTT   |
| pLJJ190-2-R | AAGCCAAATTACAAGTAAAGATTAGTAAAG                                 |
| pLJJ191-1-F | GGTCTCGGATCCATGGTCAAGATATTCAGAGGTTTTAGAGCTAGAA<br>ATAGCA       |
| pLJJ189-1-F | CAATACCAGTCCGGATCAACTGG                                        |
| pLJJ189-1-R | GGCTTTTTGAGTTTCTGGAATAGACATTG                                  |
| pLJJ189-2-F | CAATGTCTATTCCAGAACTCAAAAAGCCAACGACATTACTATATAT<br>ATAATAT      |
| pLJJ189-2-R | CTGCTGAAGCTACCATGTCTACAGTTCCTGATGCGGTATTTTCTCCTT<br>ACGCA      |
| pLJJ189-3-F | AACTGTAGACATGGTAGCTTCAGCAG                                     |
| pLJJ189-3-R | TCAACTCCAGTCCATAAATGGGGTTAT                                    |
| pLJJ192-1-F | CCGTGTAAAACCATGAGGCTTCTTC                                      |

|             |                                                                |
|-------------|----------------------------------------------------------------|
| pLJJ192-1-R | TCTTAATTCTTTTATGTGCTTTTACTACTTTG                               |
| pLJJ192-2-F | AAGTAGTAAAAGCACATAAAAGAATTAAGATTGTGTCCACTAAGGC<br>GACGCC       |
| pLJJ192-2-R | TTATACATTTTCCTGACTGTTGTTAACAAT                                 |
| pLJJ193-1-F | GGTCTCGGATCGGGGTTAATTAATAGGTCAAGTTTTAGAGCTAGAA<br>ATAGCA       |
| pLJJ194-1-F | TGGCAAGAAACCAAACCTACGGCATA                                     |
| pLJJ194-1-R | TCGCTAAATCTCTCTTTTAGAGTCTTTTC                                  |
| pLJJ194-2-F | ACTCTAAAAGAGAGATTTAGCGATTGGTCAAAAACATTGAAAGCAA<br>ACT          |
| pLJJ194-2-R | TCCCAAAGGCGGACCATTGAGC                                         |
| pLJJ195-1-F | GGTCTCGGATCCATTCAAAGGACCTGCCAGTTTTAGAGCTAGAA<br>ATAGCA         |
| pLJJ198-1-F | AAAAGCTGGAGCTCTAGTAGTTTAAACAACCTTATGCAGATGTGACC<br>ATAACCCTGG  |
| pLJJ198-1-R | GGACGCTCGAAGGCTTTAATTTGCGATCCTAAACTGCGTCATAGTAA<br>GTT         |
| pLJJ198-2-F | TATCGACAAAGGAAAAGGGGCCTGTTTAGTTGTCCAAAGAGAGATT<br>TATGTGAAC    |
| pLJJ198-2-R | AAGAATTTTGAATAATTCAATATAAATGCCTACCTTGATACTGATAT<br>CGAA        |
| pLJJ198-3-F | TAACGTCAAGGAGAAAAAACTATAATGACTAAGCTACACTTTGACA<br>CTGCTGAAC    |
| pLJJ198-3-R | CTATCGATTTCAATTCAATTCAATTTACAACCTAATTCTGACAGCTTT<br>TACTT      |
| P199-1-F    | GGTCTCGGATCCCTGTGGTGACTACGTATCCGTTTTAGAGCTAGAAA<br>TAGCA       |
| pLJJ200-1-F | CAAAAGCTGGAGCTCTAGTAGTTTAAACGTATATTTATTGAGTCCT<br>TCTTACA      |
| pLJJ200-1-R | TTTTGGGACGCTCGAAGGCTTTAATTTGCCGGATAATTTGAGCAATG<br>ATAGT       |
| pLJJ200-2-F | GATATCGACAAAGGAAAAGGGGCCTGTTTACAACCTGACCGAATCA<br>ATTAGATGTCT  |
| pLJJ200-2-R | TAAGAATTTTGAATAATTCAATATAAATGTCGCCCTCTGCCGTACAA<br>TC          |
| pLJJ200-3-F | ACTTTAACGTCAAGGAGAAAAAACTATAATGACAATCAAGGAACAT<br>AAAGTAGTTTAT |
| pLJJ200-3-R | ATCTATCGATTTCAATTCAATTCAATTTATTTCTTTTTTTGAGAGAAA               |
| pLJJ200-4-F | ATAACTCGAAAATTCTGCGTTCGTTTTTTTAAGACGCATCTCCAAAA<br>AAGAAAAAG   |
| pLJJ200-4-R | CCATTCAGGCTGCGCAACTGTTGTTTAAACAATCACCTCTCTCGAA<br>AGTCAAAGGT   |
| pLJJ201-1-F | GGTCTCGGATCGCGCCACAGTTTCAAGGGTCGTTTTAGAGCTAGAA<br>ATAGCA       |

|             |                                                                |
|-------------|----------------------------------------------------------------|
| pLJJ196-1-F | AGCTGGAGCTCTAGTAGTTTAAACATATTGACCAGTAGTCATATTAC<br>TGGCA       |
| pLJJ196-1-R | TTGGGACGCTCGAAGGCTTTAATTTGCAGGATATTAATTTTAGGGTC<br>TC          |
| pLJJ196-2-F | TCGACAAAGGAAAAGGGGCCTGTCTATGATCGAGTCTTGGCCTTGG<br>AAACG        |
| pLJJ196-2-R | AGTAAGAATTTTTGAAAATTCAATATAAATGTCTGCCAACGAGAACA<br>TCTCC       |
| pLJJ196-3-F | TAACGTCAAGGAGAAAAAACTATAATGTCAGCGAAATCCATTACAG<br>AGGCCGA      |
| pLJJ196-3-R | ATTTTCAAGAAGGATAGTAAGCTGGCAAATTAAACTCCGAGAGGAG<br>TGGAAG       |
| pLJJ196-4-F | AACAGTTGAATATTCCCTCAAAAATGTCCAGTAAAGCTACCAAAAG<br>TG           |
| pLJJ196-4-R | TAAAAATCATAAATCATAAGAAATTCGCTCAGGCTAGCATAACTAAG<br>ACCTT       |
| pLJJ196-5-F | TTATTGACCACACCTCTACCGGTAGTAAATTATCACTGTTTTTCATCTA<br>GA        |
| pLJJ196-5-R | CCATTCAGGCTGCGCAACTGTTGTTTAAACCAATACCAGAGATGAC<br>TGGCCAAC     |
| pLJJ197-1-F | GGTCTCGGATCTTATGTGCGTATTGCTTTCAGTTTTAGAGCTAGAAA<br>TAGCA       |
| pLJJ132-1-F | CAATTTGGCACCTGCATACCCCAT                                       |
| pLJJ132-1-R | TATATATATAGTAATGTCGTTAGATCTCTTGTTGTAGTCCATGACGGG<br>AGT        |
| pLJJ132-2-F | ATCTAACGACATTACTATATATATA                                      |
| pLJJ132-2-R | CATAAAAAAATATAGAGTGTAAGCTGATGCGGTATTTTCTCCTTA<br>CG            |
| pLJJ132-3-F | CGTAAGGAGAAAATACCGCATCAGGCTAGTACACTCTATATTTTTTT<br>ATG         |
| pLJJ132-3-R | GAACATTAGGCACGGTTGAGACCGAAGATCTATCTGTGCGGTATTTT<br>ACACCGCATAG |
| pLJJ132-4-F | TCTTCGGTCTCAACCGTGCCTAATGTTC                                   |
| pLJJ132-4-R | CCTGATGCGGTATTTTCTCCTTAC                                       |
| pLJJ132-5-F | GTAAGGAGAAAATACCGCATCAGGAAGTGTGGGAATACTCAGGTAT<br>CGTAA        |
| pLJJ132-5-R | ATTAGGAATCATAGTTTCATGATT                                       |
| pLJJ132-6-F | AATCATGAACTATGATTCCTAATCCCAGTGCAGCGAACGTTATAAA<br>AAC          |
| pLJJ132-6-R | GGCCAGTGAATTCGAGCTCGGTACCCGGGAAAATATGACCCCCAAT<br>ATGAGAAATTAA |
| pLJJ134-1-F | GGTCTCGGATCTCAAGCCGAATCCATTTATAGTTTTAGAGCTAGAAA<br>TAGCAAGTTAA |



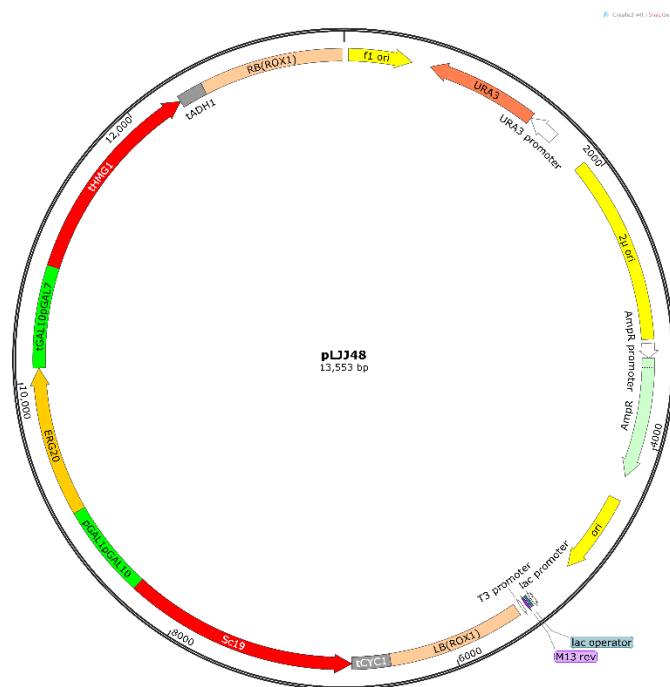

Fig. S3 Plasmid map for expressing M3 module

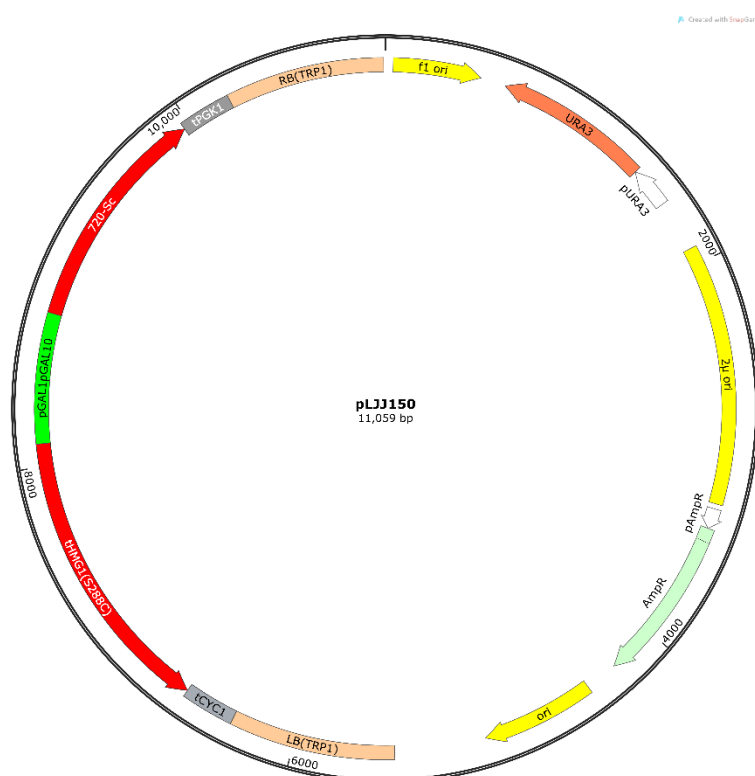

Fig. S4 Plasmid map for expressing M4 module



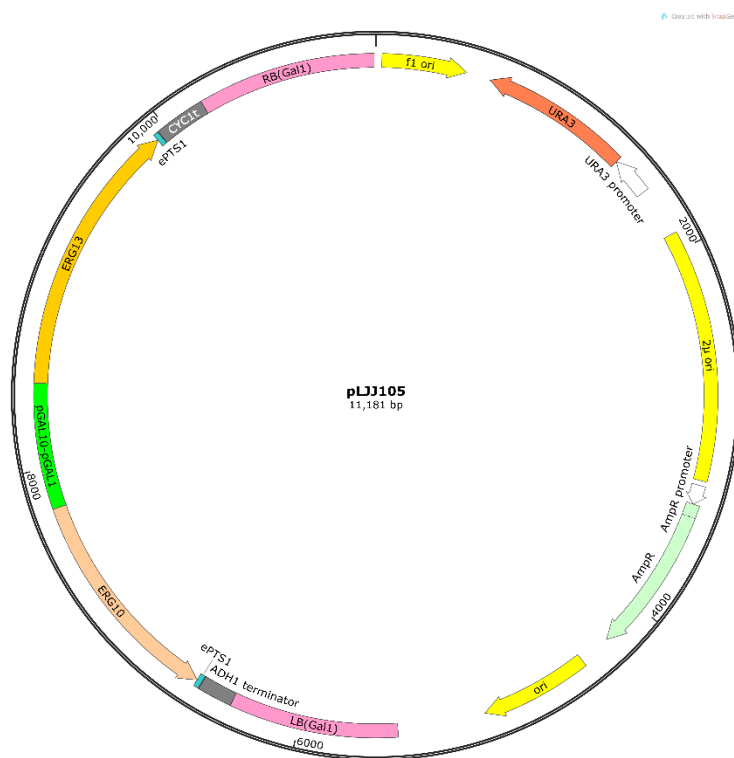

Fig. S5 Plasmid map for expressing M5 module

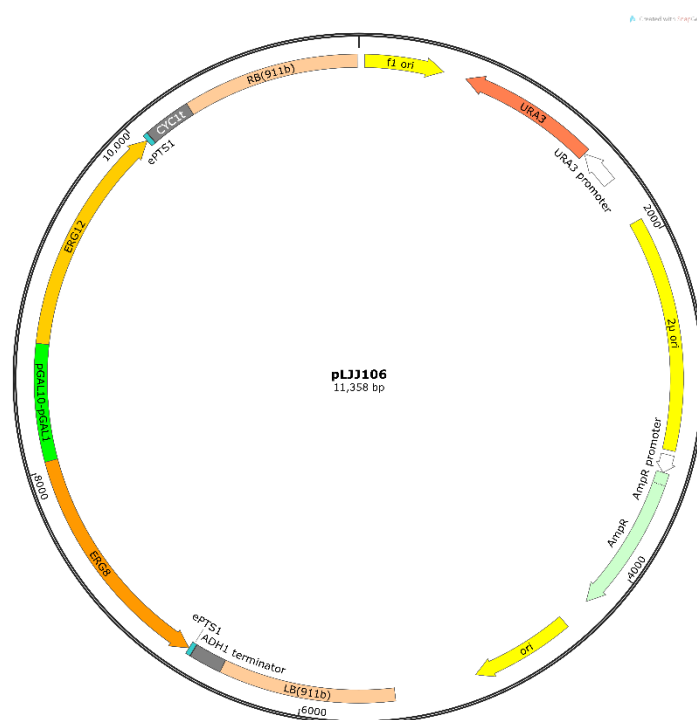

Fig. S6 Plasmid map for expressing M6 module

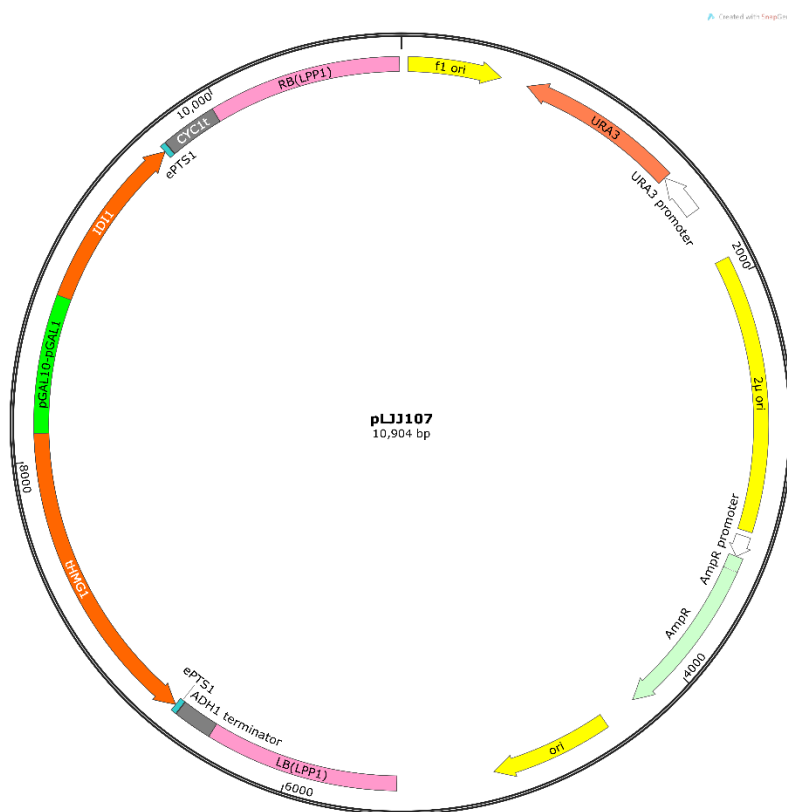

Fig. S7 Plasmid map for expressing M7 module

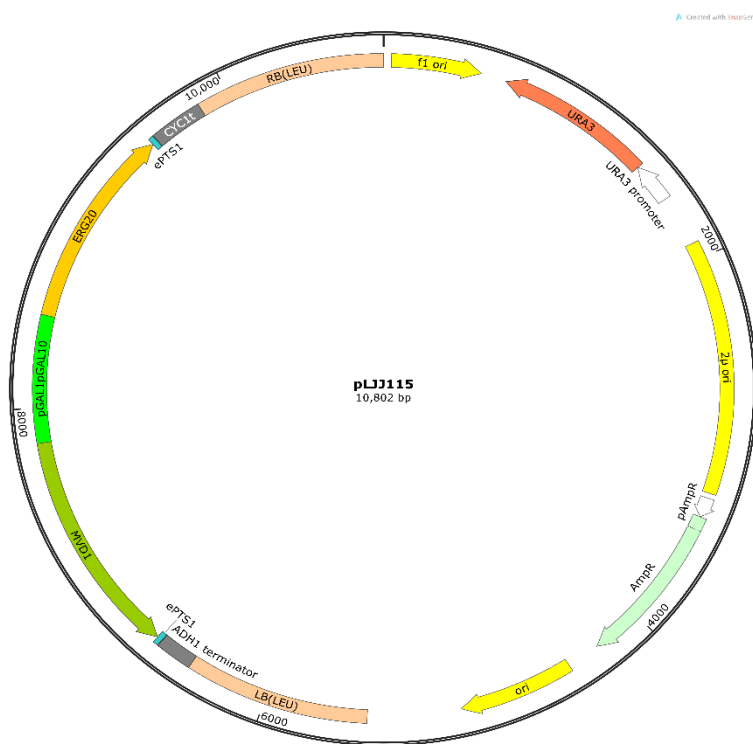

Fig. S8 Plasmid map for expressing M8 module

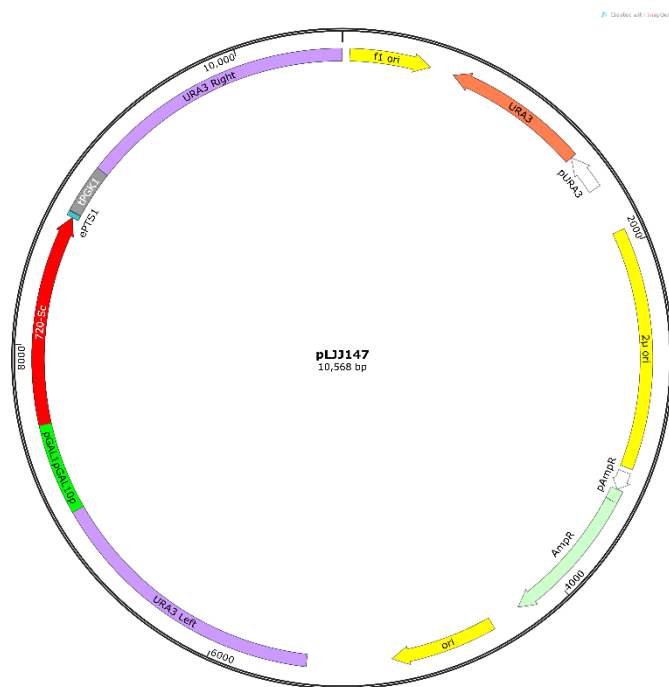

Fig. S9 Plasmid map for expressing M9 module

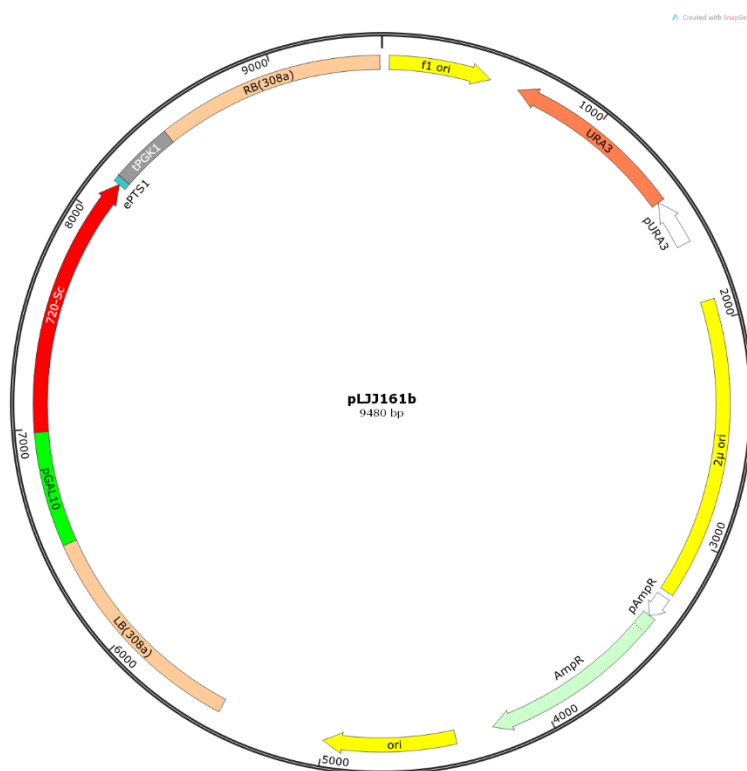

Fig. S10 Plasmid map for expressing M10 module

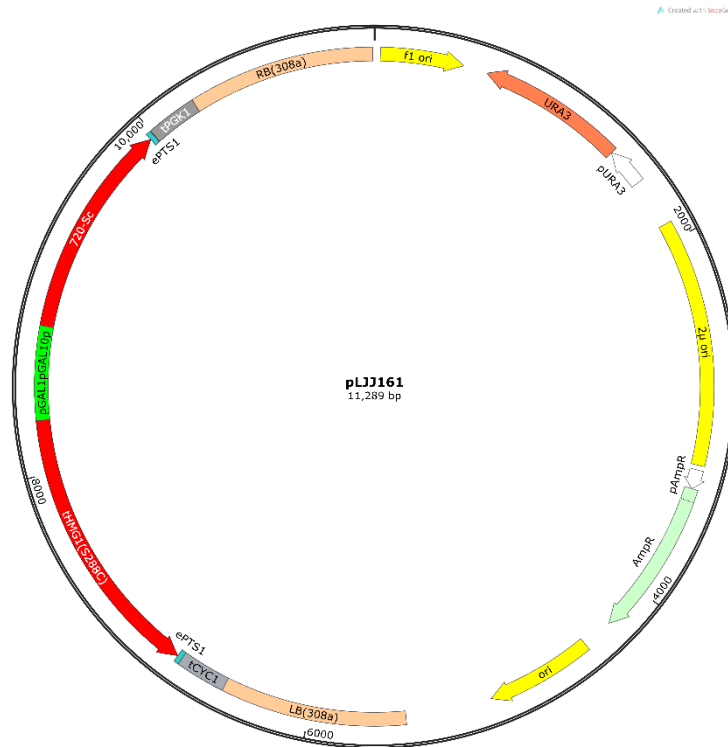

Fig. S11 Plasmid map for expressing M11 module

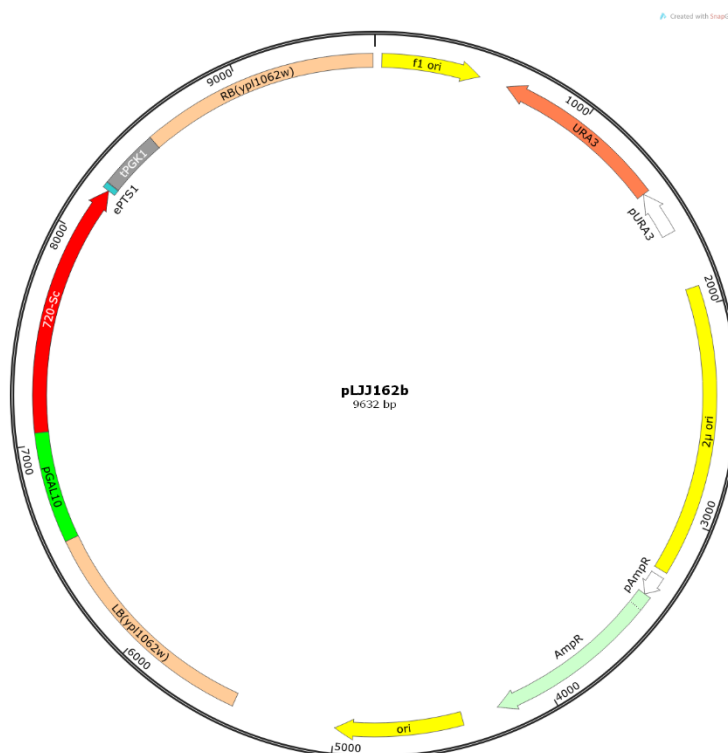

Fig. S12 Plasmid map for expressing M12 module

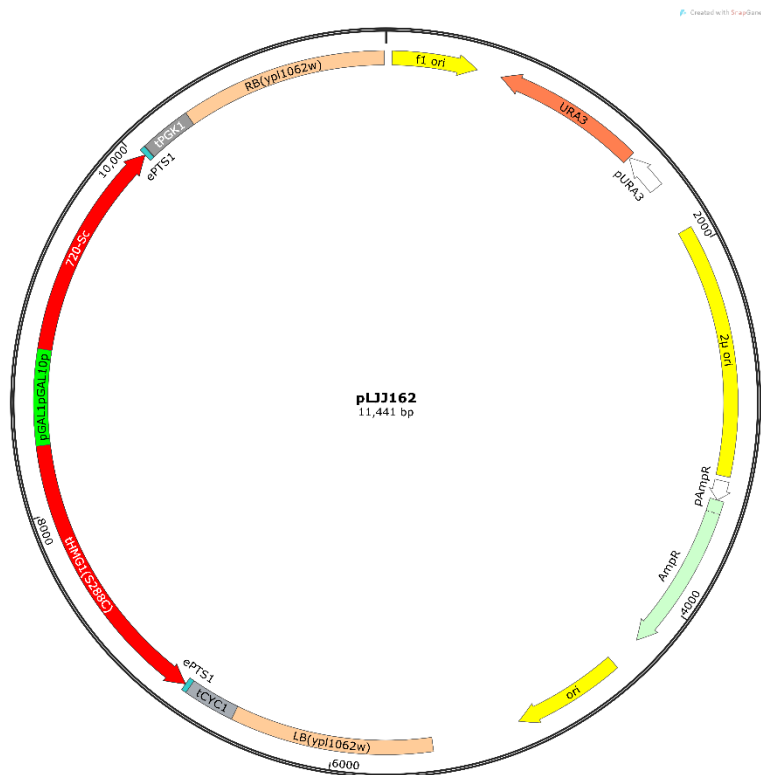

Fig. S13 Plasmid map for expressing M13 module

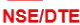

**Fig. S14** Amino acids alignment of AcPS5 reported bisabolene synthases. The conserved motifs are marked respectively.

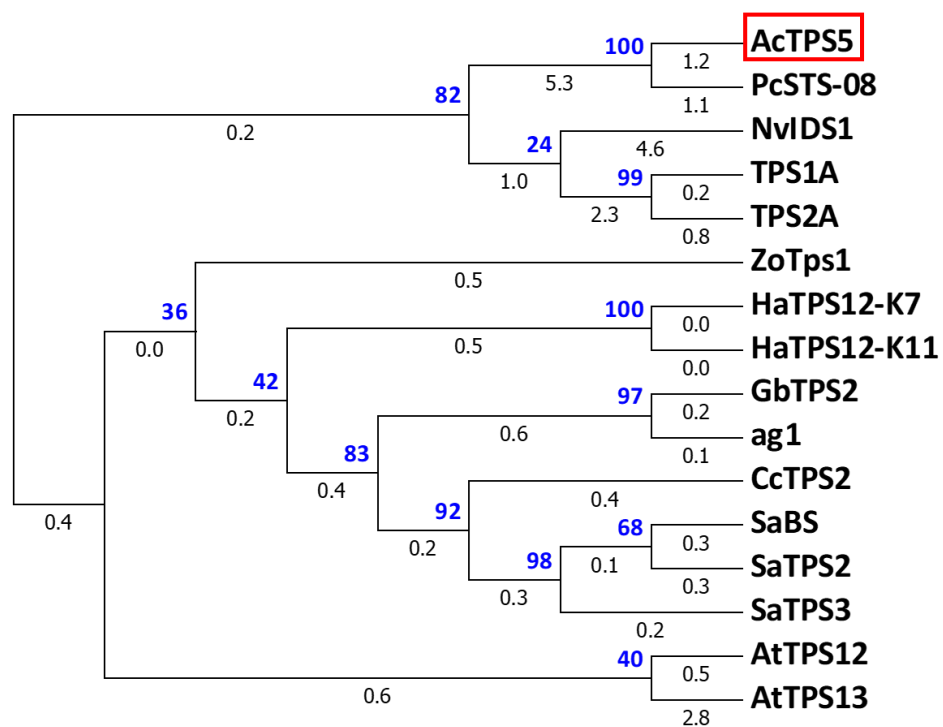

**Fig. S15** Phylogenetic analysis of AcTPS5 and bisabolene synthases from other species. The proteins used were shown in Additional file 1: Table. S1. The branch lengths and bootstrap values are presented at the nodes in black and blue, respectively.

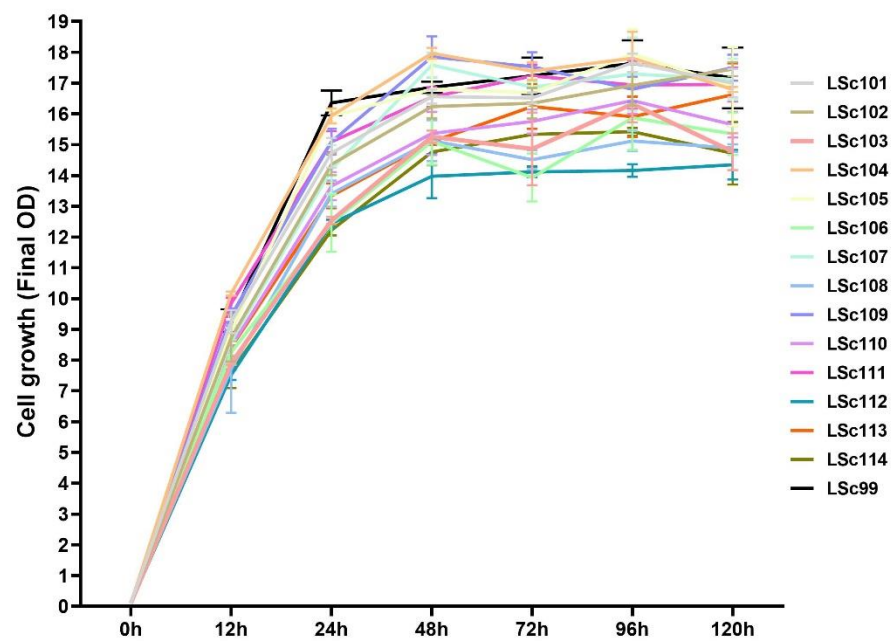

**Fig. S16** Time course profiles of Cell growth. Error bars represent standard deviations from three independent experiments.
